# Supplementary material for: Self-report symptom-based endometriosis prediction using machine learning
Source: Springer Nature journal article supplement (doi:10.1038/s41598-023-32761-8), 2023-04-04
Supplement: MOESM1 [file 41598_2023_32761_MOESM1_ESM.pdf]

## Supplementary Information

### Self-Report Symptom-Based Endometriosis Prediction using Machine Learning

Anat Goldstein<sup>\*1</sup> and Shani Cohen<sup>2</sup>

<sup>1</sup> Department of Industrial Engineering and Management, Ariel University, 65 Ramat HaGolan St., Ariel, Israel, [anatgo@ariel.ac.il](mailto:anatgo@ariel.ac.il).

<sup>2</sup> Department of Computer Science, Ariel University, 65 Ramat HaGolan St., Ariel, Israel

#### Endometriosis symptom questionnaire

Were you diagnosed with endometriosis?

☐ Yes ☐ No

Please check all the symptoms below that you experienced at least once in the past few months.

- ☐ Heavy / Extreme menstrual bleeding
- ☐ Menstrual pain (Dysmenorrhea)
- ☐ Painful / Burning pain during intercourse (Dyspareunia)
- ☐ Pelvic pain
- ☐ Irregular / Missed periods
- ☐ Cramping
- ☐ Abdominal pain / Pressure
- ☐ Back pain
- ☐ Painful bowel movements
- ☐ Nausea
- ☐ Menstrual clots
- ☐ Infertility
- ☐ Painful cramps during period
- ☐ Pain / Chronic pain
- ☐ Diarrhea
- ☐ Long menstruation
- ☐ Constipation / Chronic constipation
- ☐ Vomiting / constant vomiting
- ☐ Fatigue / Chronic fatigue
- ☐ Painful ovulation
- ☐ Stomach cramping
- ☐ Migraines
- ☐ Extreme / Severe pain
- ☐ Leg pain
- ☐ Irritable Bowel Syndrome (IBS)
- ☐ Syncope (fainting, passing out)
- ☐ Mood swings
- ☐ Depression
- ☐ Lower back pain
- ☐ Fertility issues
- ☐ Ovarian cysts
- ☐ Painful urination
- ☐ Headaches

- ☐ Constant bleeding
- ☐ Pain after intercourse
- ☐ Digestive / GI problems
- ☐ IBS-like symptoms
- ☐ Anaemia / Iron deficiency
- ☐ Hip pain
- ☐ Vaginal Pain/Pressure
- ☐ Sharp / Stabbing pain
- ☐ Bowel pain
- ☐ Anxiety
- ☐ Cysts (unspecified)
- ☐ Dizziness
- ☐ Malaise
- ☐ Abnormal uterine bleeding
- ☐ Fever
- ☐ Hormonal problems
- ☐ Bloating
- ☐ Feeling sick
- ☐ Decreased energy / Exhaustion
- ☐ Abdominal Cramps during Intercourse
- ☐ Insomnia / Sleeplessness
- ☐ Acne / pimples
- ☐ Loss of appetite
